# Supplementary material for: Abeta(1-42) Enhances Neuronal Excitability in the CA1 via NR2B Subunit-Containing NMDA Receptors
Source: Hindawi journal article supplement (doi:10.1155/2014/584314), 2014-01-01
Supplement: f1 [file 584314.f1.pdf]

## Supplementary material

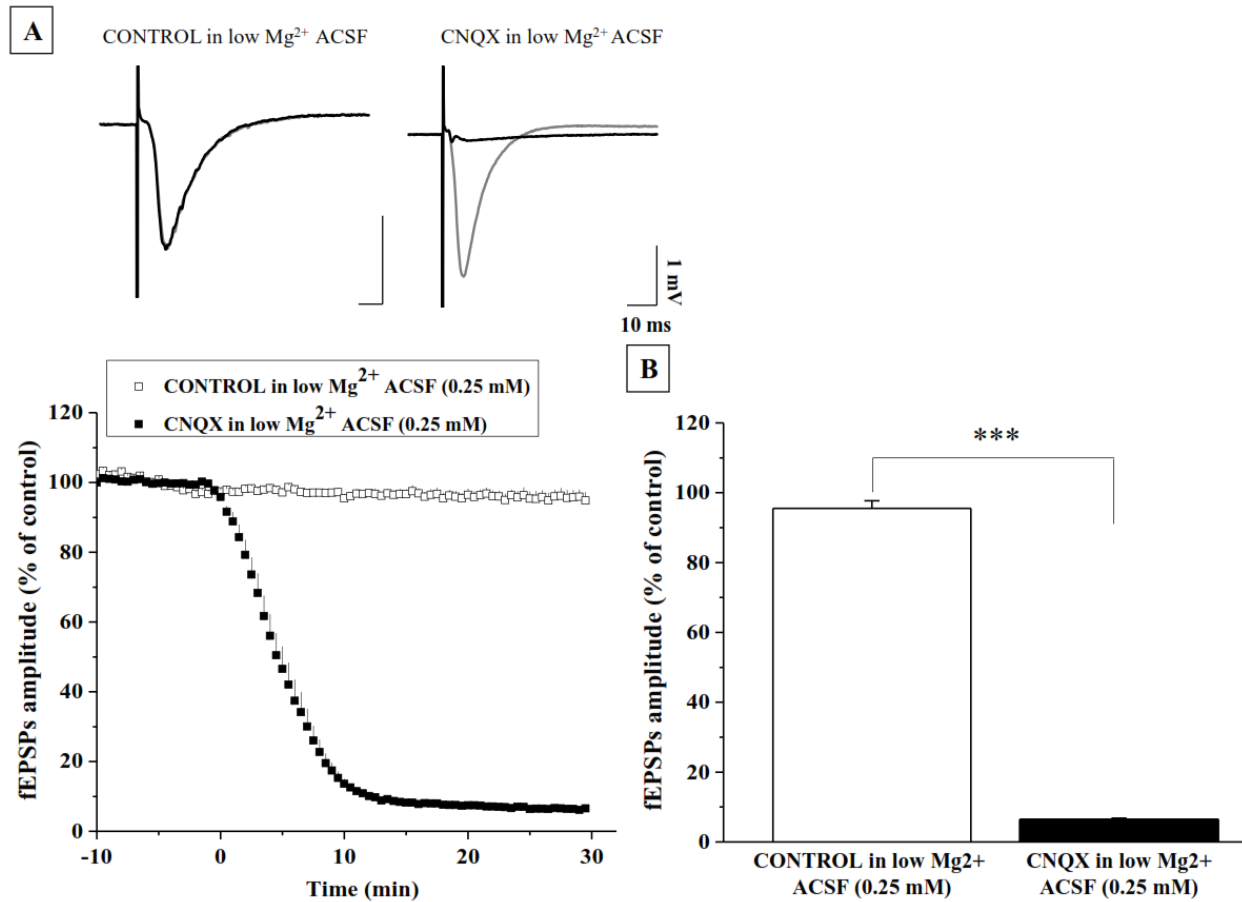

**Supplementary Figure 1.** CNQX abolished evoked fEPSPs even under condition that promotes NMDAR activation (in low  $Mg^{2+}$  ACSF) (**A**). Upper panel shows representative fEPSPs before (gray) and after (black) treatment. Bar graphs show the average of the fEPSPs amplitudes of the 25-30 min period after treatment (**B**). Error bars show SEM; \*\*\*  $p \leq 0.001$ .

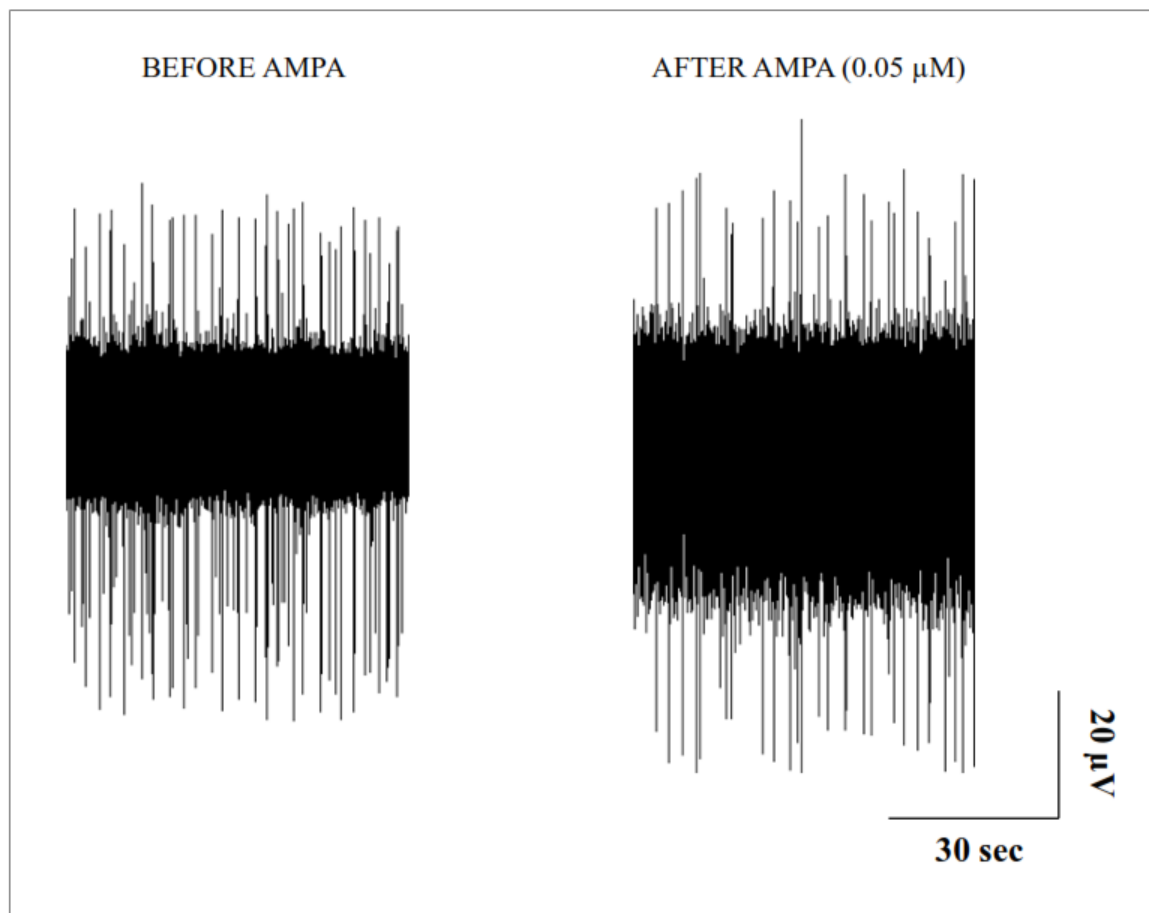

**Supplementary Figure 2.** Low concentration of AMPA (0.05  $\mu$ M) increased basal activity which hindered the effective detection of spikes. Figure shows representative traces before (left) and after (right) AMPA application.

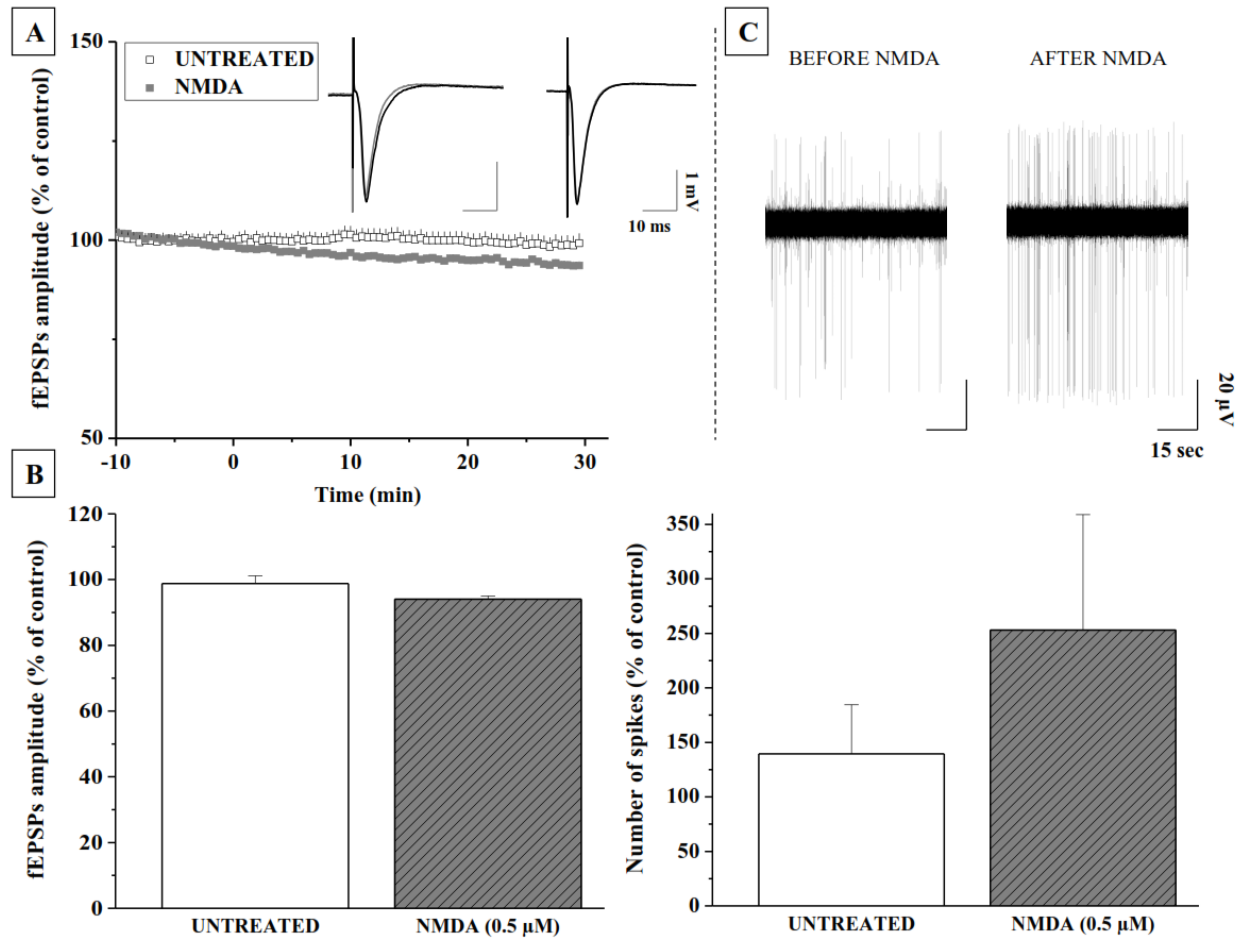

**Supplementary Figure 3.** Small concentration of NMDA (0.5  $\mu$ M), which was reported to activate extrasynaptic NMDARs, did not affect fEPSPs (**A**). Inset shows representative fEPSPs before (grey) and after (black) treatment. Bar graphs show the average of the fEPSPs amplitudes of the 25-30 min period after treatment (**B**). Low concentration of NMDA elevated spiking frequency, although not significantly (**C**). Inset shows representative spike trains before and after treatment. Error bars show SEM.

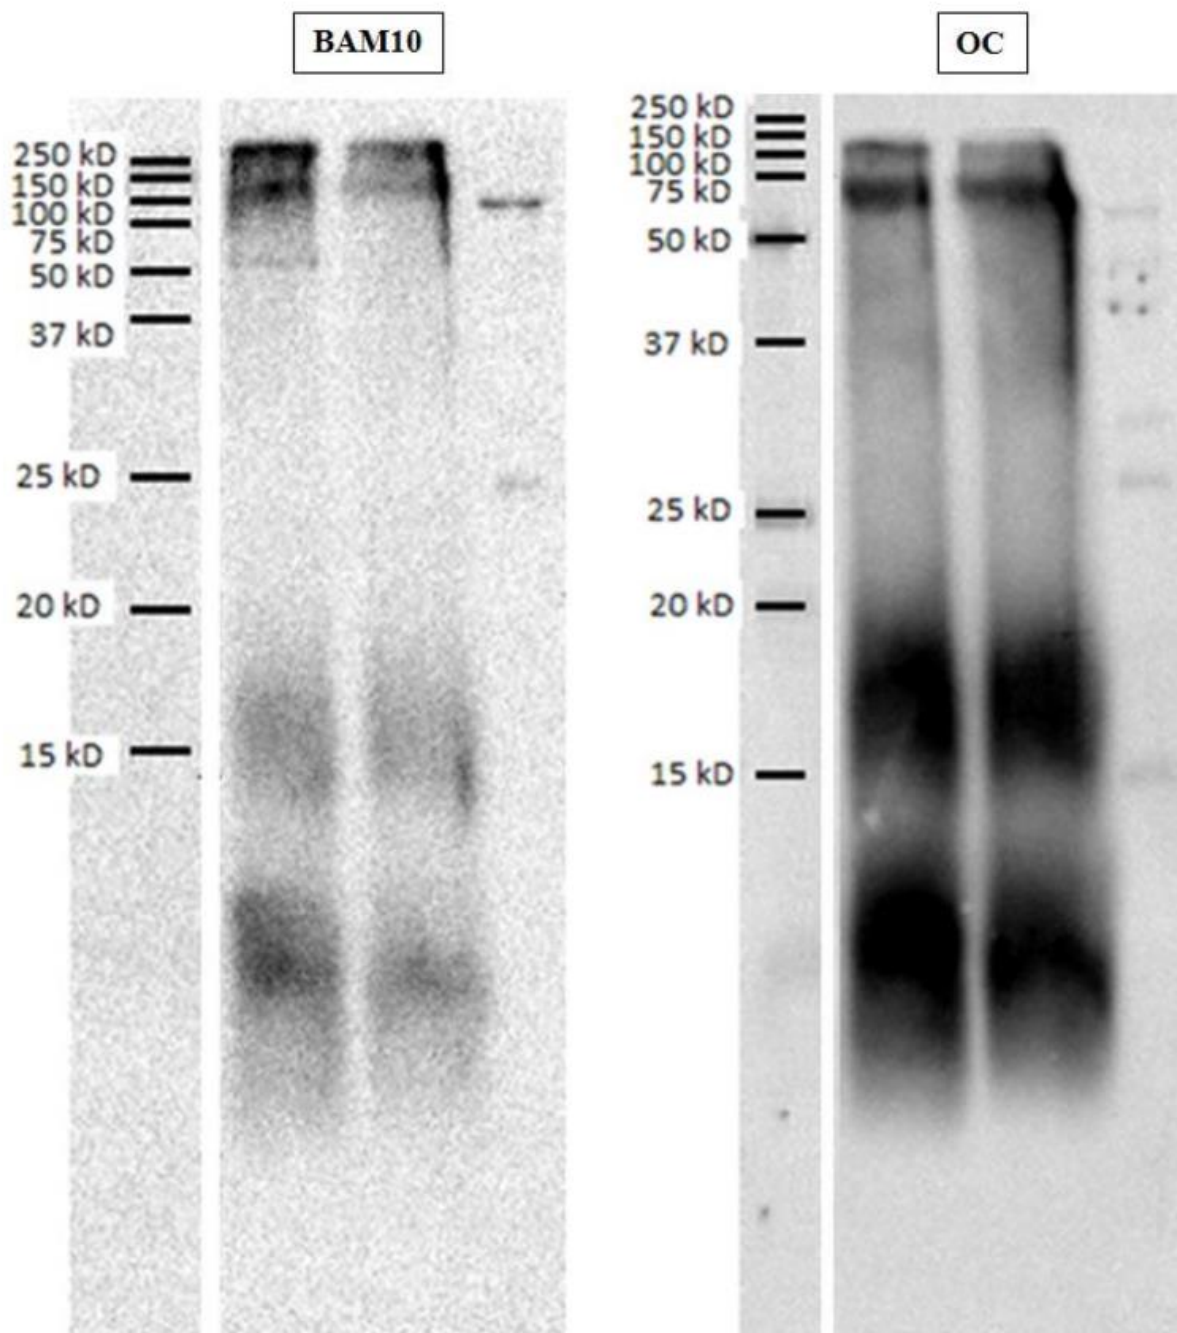

**Supplementary Figure 4.** Abeta(1-42) samples used for the recordings contained clearly detectable SDS-stable trimers ( $\approx 15$  kDa) and higher molecular weight protofibrils. Staining with OC antibody, which is specific for species having beta-sheet conformation, shows that the small low-n oligomers are of prefibrillar nature.
